# Supplementary material for: Luteolin Isolated from Juncus acutus L., a Potential Remedy for Human Coronavirus 229E
Source: MDPI journal article supplement (doi:10.3390/molecules28114263), 2023-05-23
Supplement: s1 [file s1]

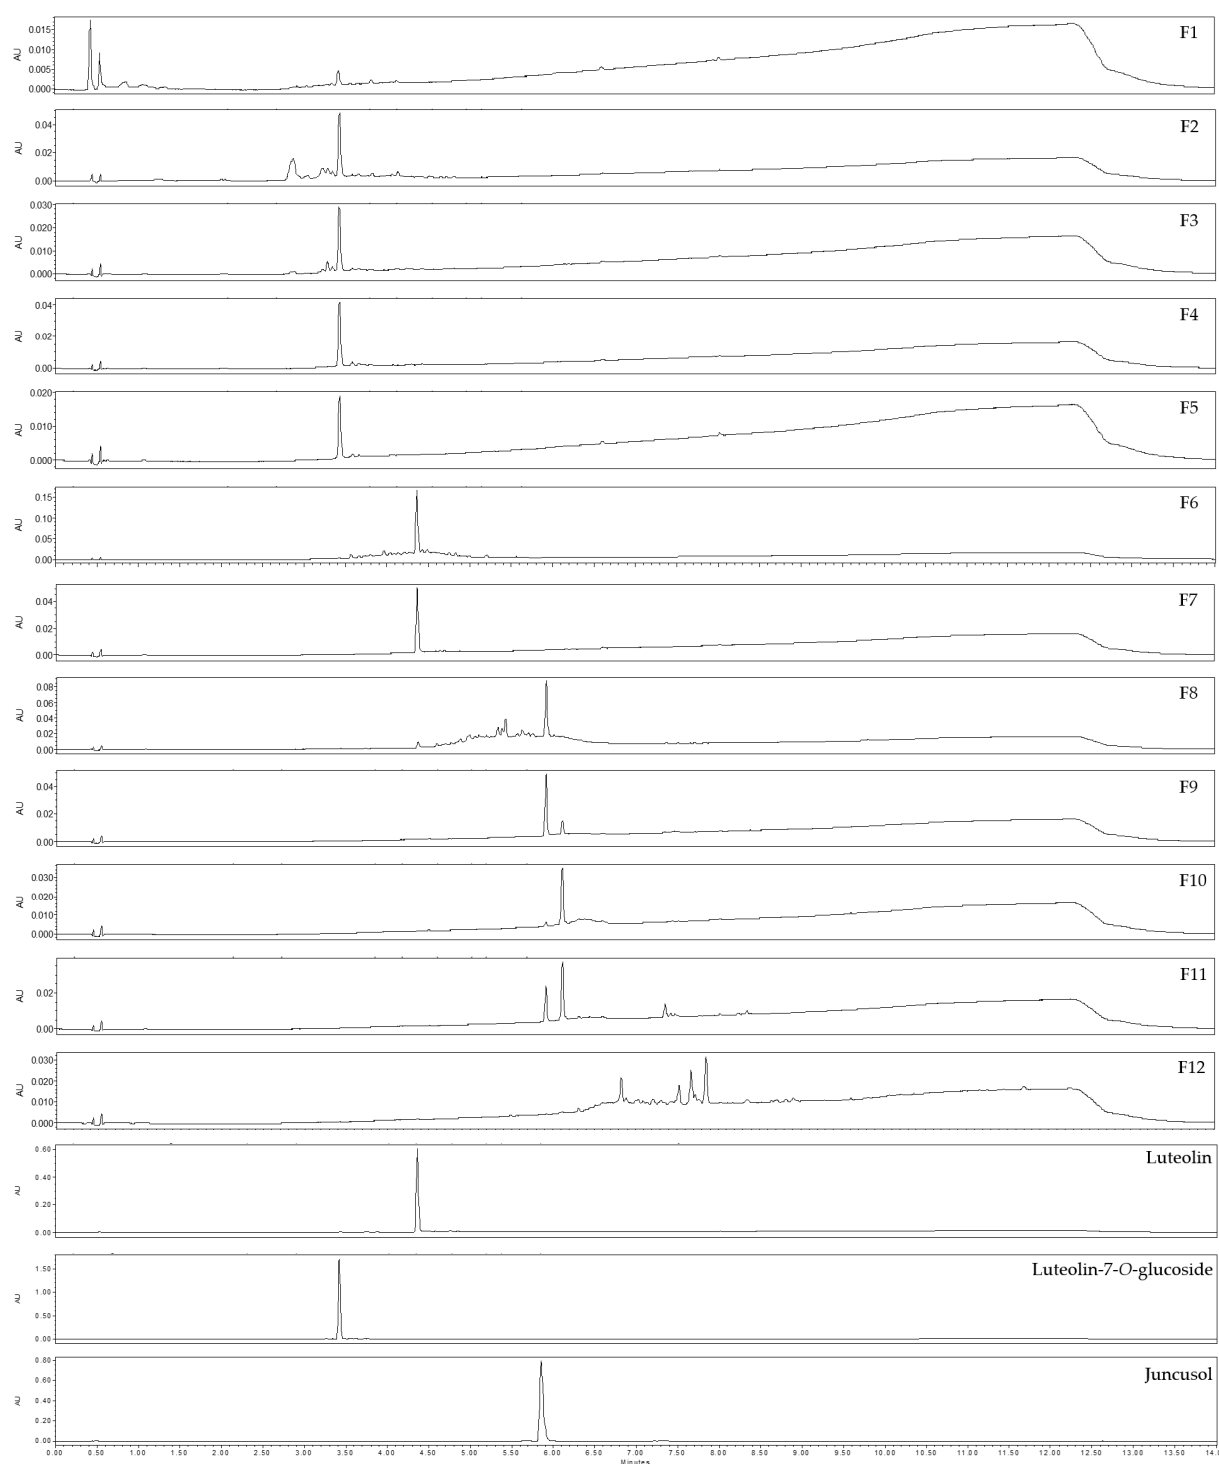

**Figure S1.** Chromatograms acquired by UHPLC-UV-MS at  $\lambda = 254$  nm of the different pre-purified fractions (F1→F12) from the ethyl acetate sub-extract of *J. acutus* stems (JA2) and of reference standards, luteolin, luteolin-7-O-glucoside and juncusol (at  $\lambda = 280$  nm)
